# Supplementary material
Source: MDPI journal article supplement (https://www.mdpi.com/2073-4344/13/7/1115)
Supplement: s1 [file s1]

## Supporting Information for

# Expression of Reaction Selectivity and the Substituent Effect in Ullmann, Suzuki, Hiyama, and Allylic Arylation Reactions Caused by Reducing Catalyst Loading

Misa Kawase, Tomohiro Shibata, Shouhei Masuu, Masaki Yamaguchi, Yoshimasa Matsumura, Osamu Shimomura and Atsushi Ohtaka \*

Department of Applied Chemistry, Faculty of Engineering, Osaka Institute of Technology, 5-16-1 Ohmiya, Asahi, Osaka 535-8585, Japan

\* Correspondence: atsushi.otaka@oit.ac.jp; Tel.: +81-6-6954-4729

## Contents

**$^1\text{H}$  and  $^{13}\text{C}$  NMR spectra**

**S2-S15**

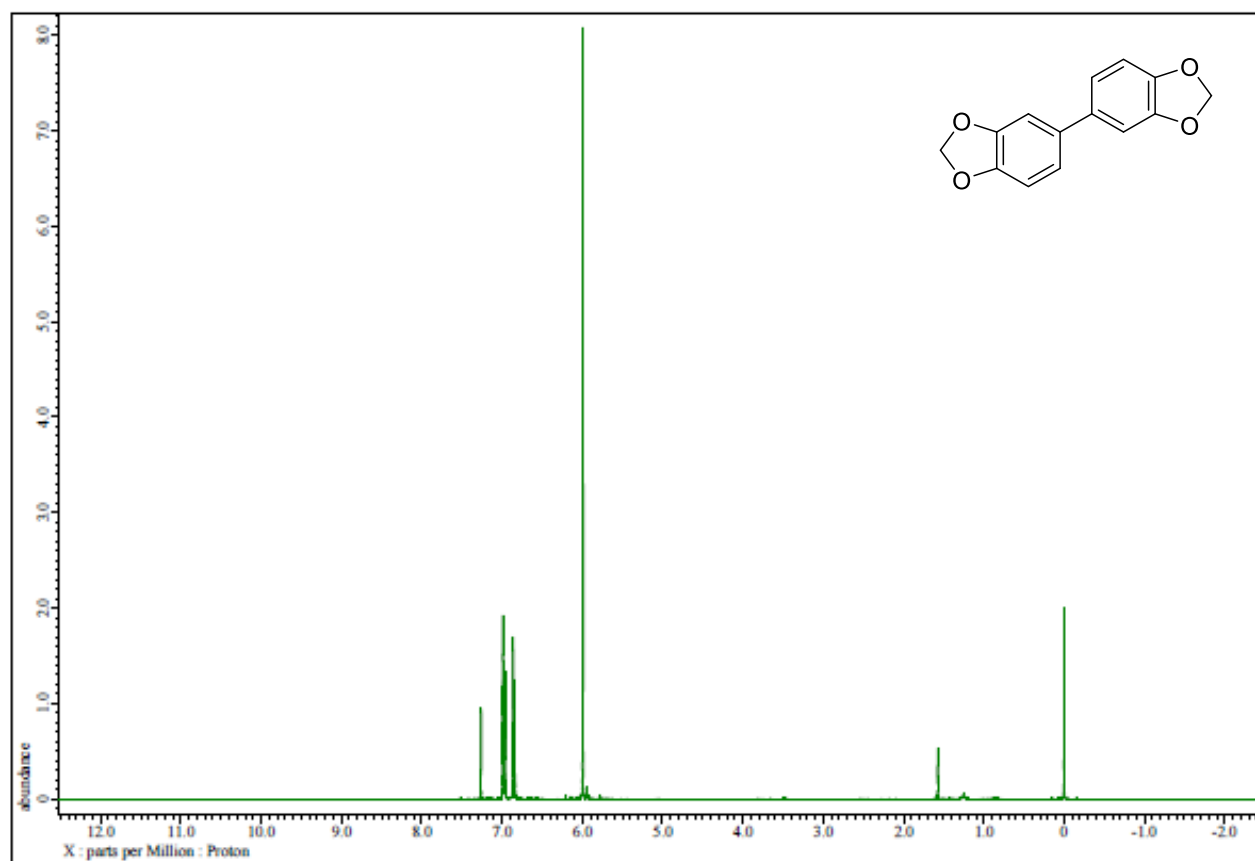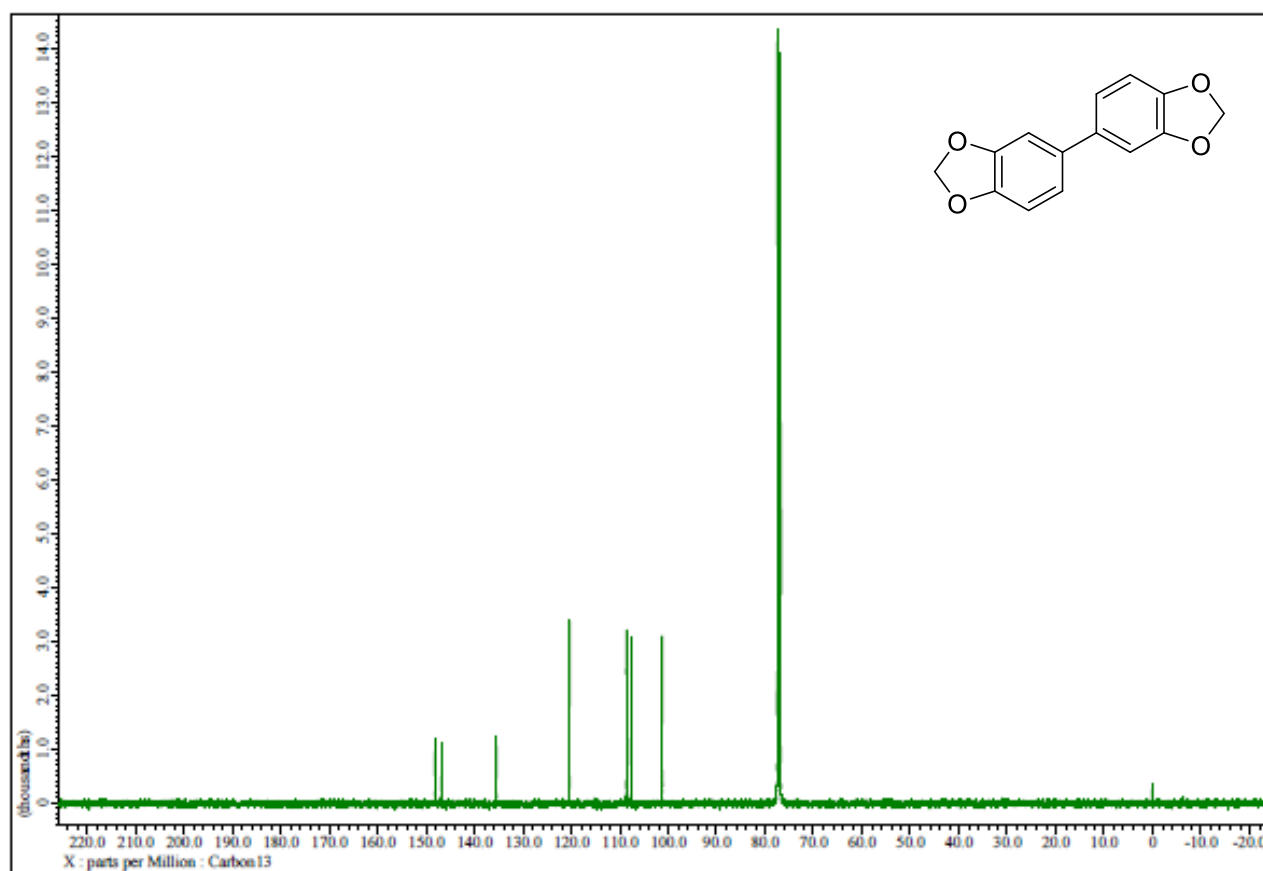

**Figure S1.** <sup>1</sup>H and <sup>13</sup>C NMR spectra of 5,5'-bi-1,3-benzodioxole.

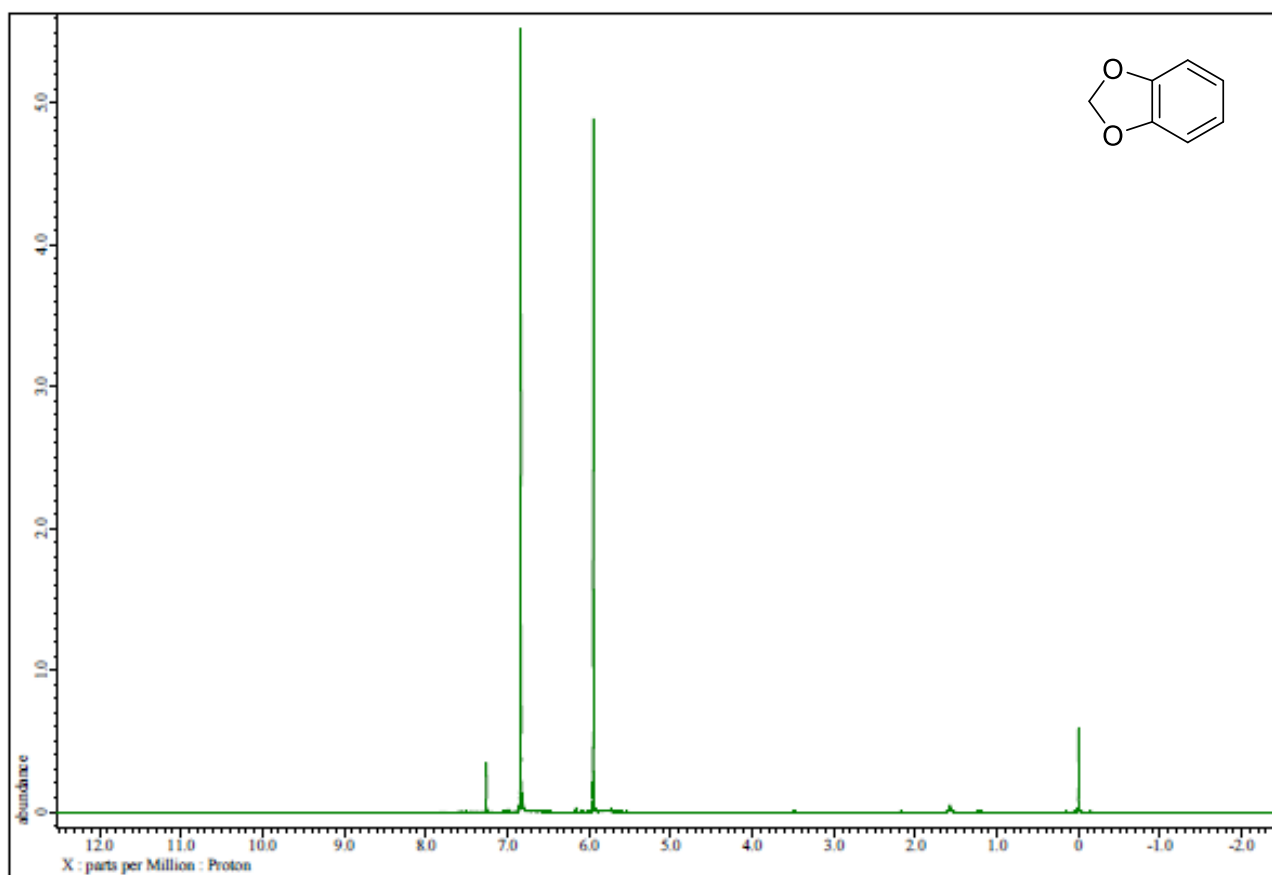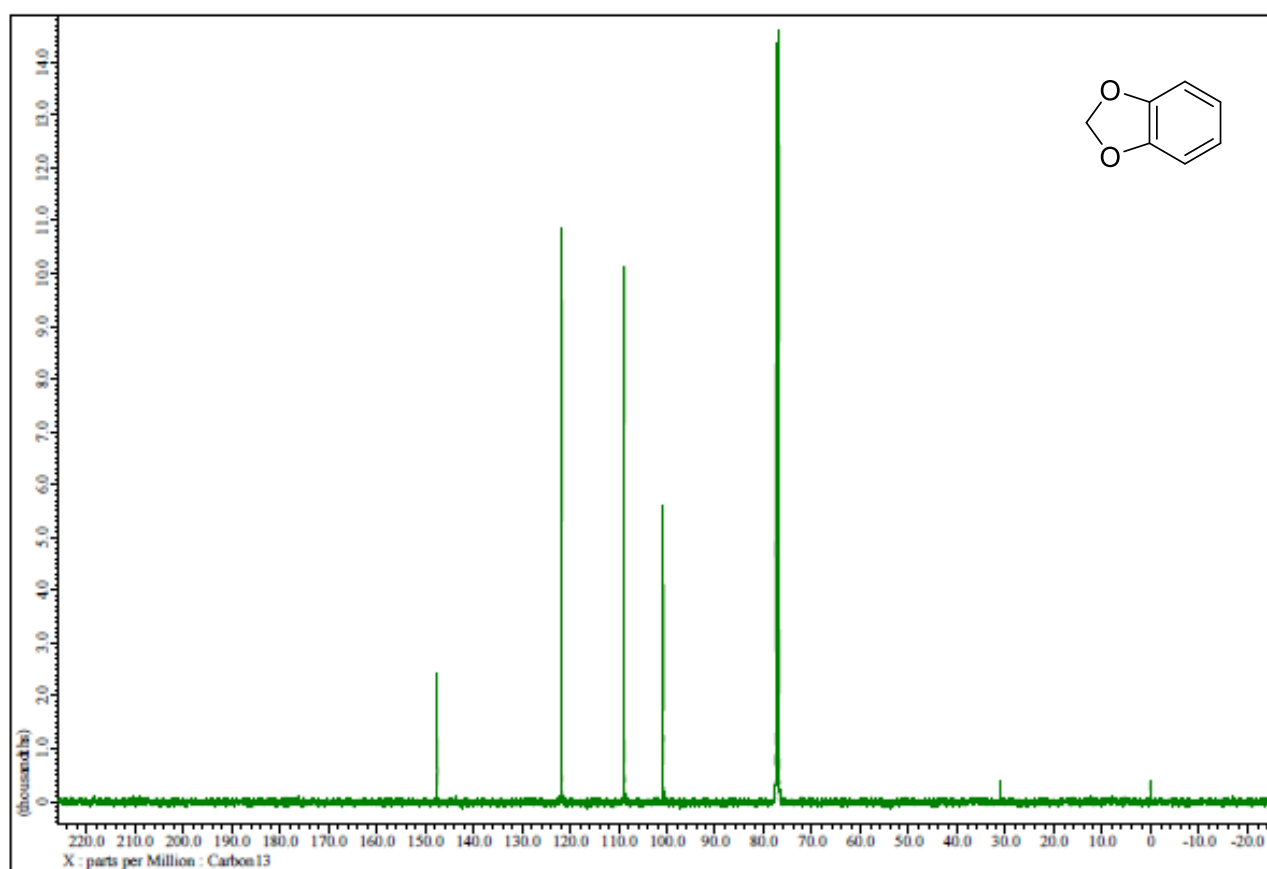

**Figure S2.** <sup>1</sup>H and <sup>13</sup>C NMR spectra of 1,3-benzodioxole.

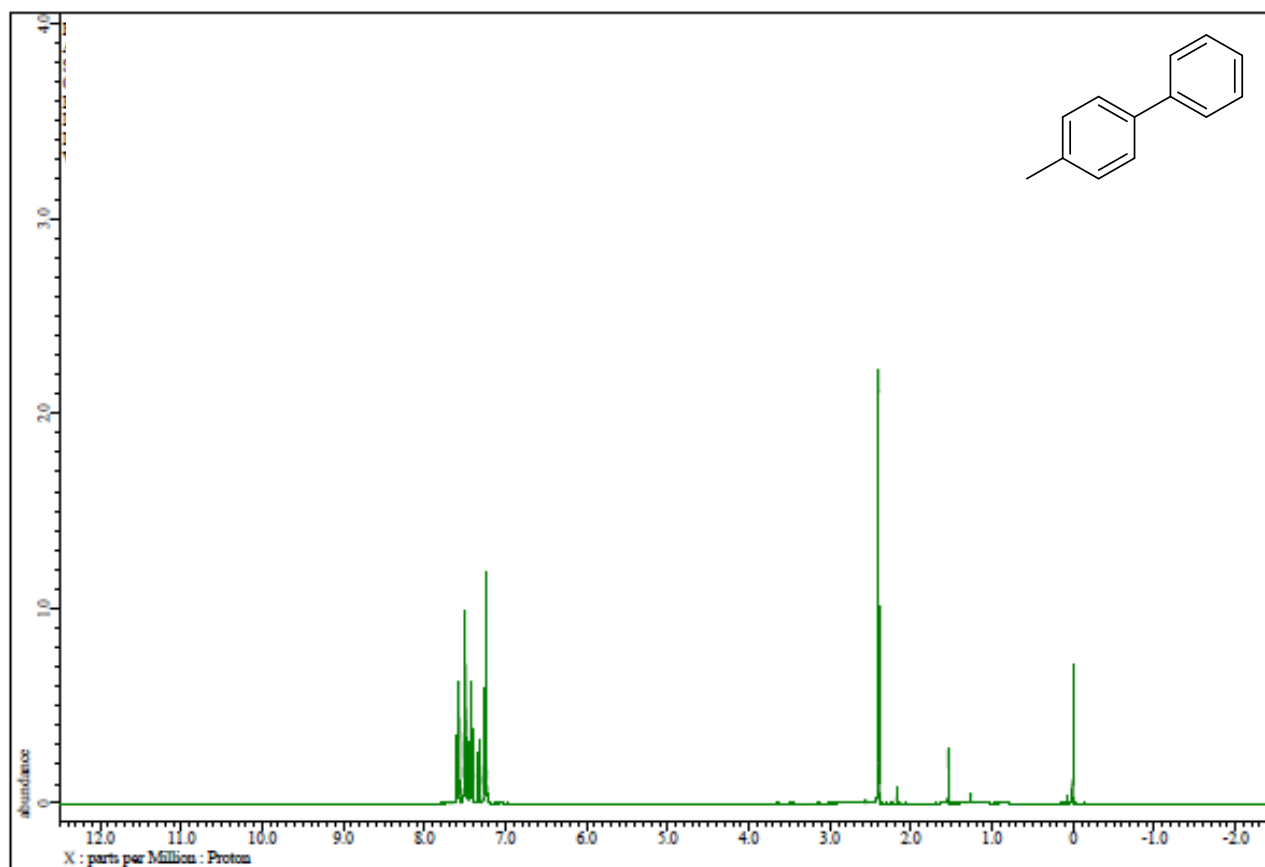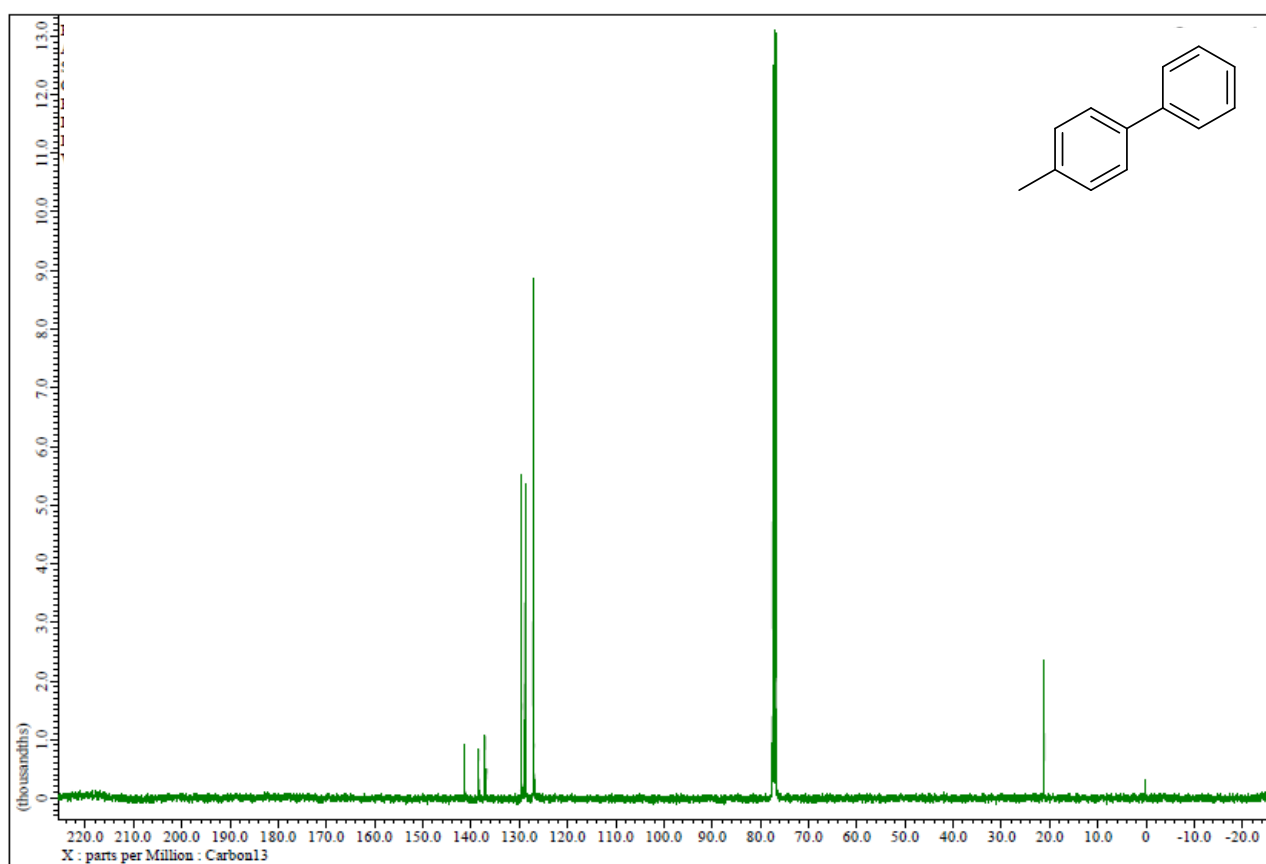

**Figure S3.** <sup>1</sup>H and <sup>13</sup>C NMR spectra of 4-methylbiphenyl.

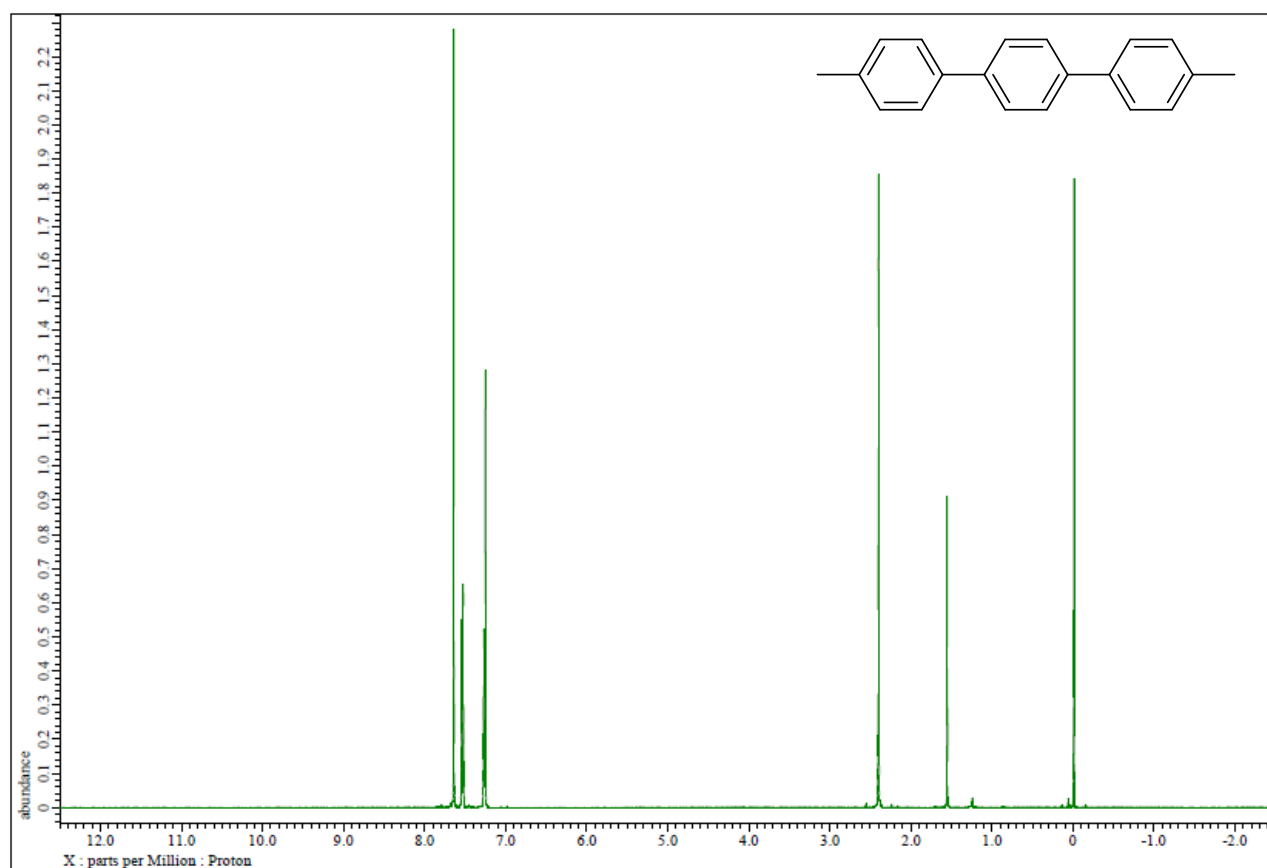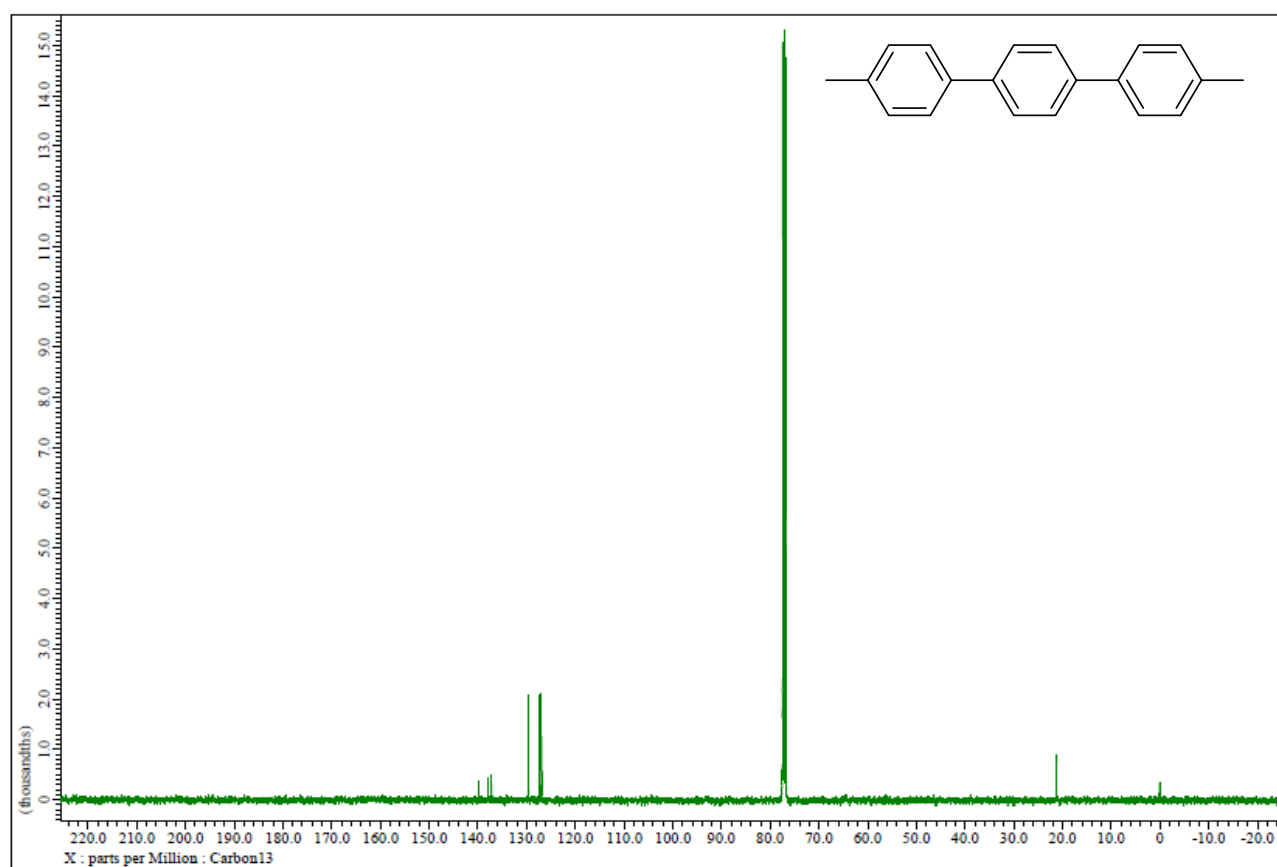

**Figure S4.** <sup>1</sup>H and <sup>13</sup>C NMR spectra of 4,4'-dimethyl-1,1':4',1''-terphenyl.

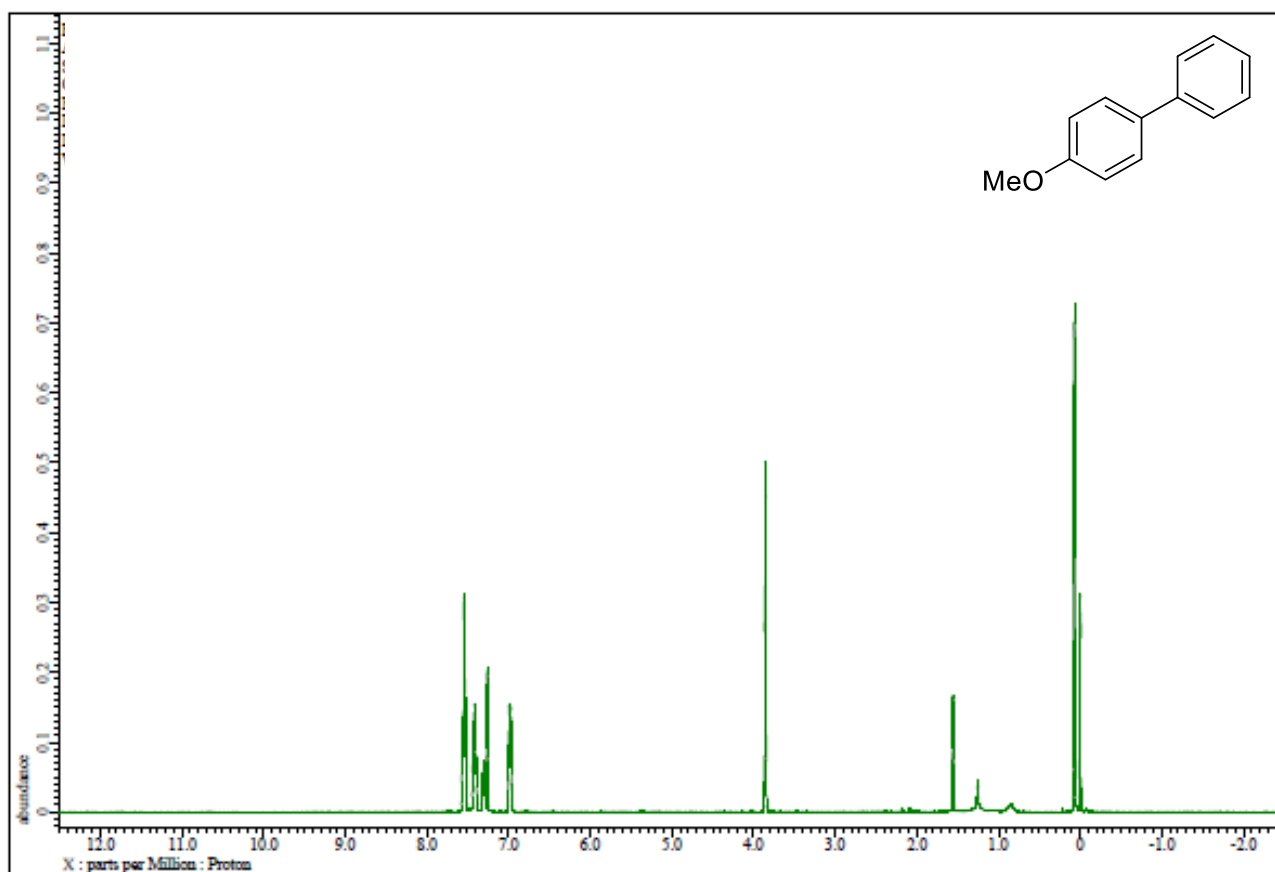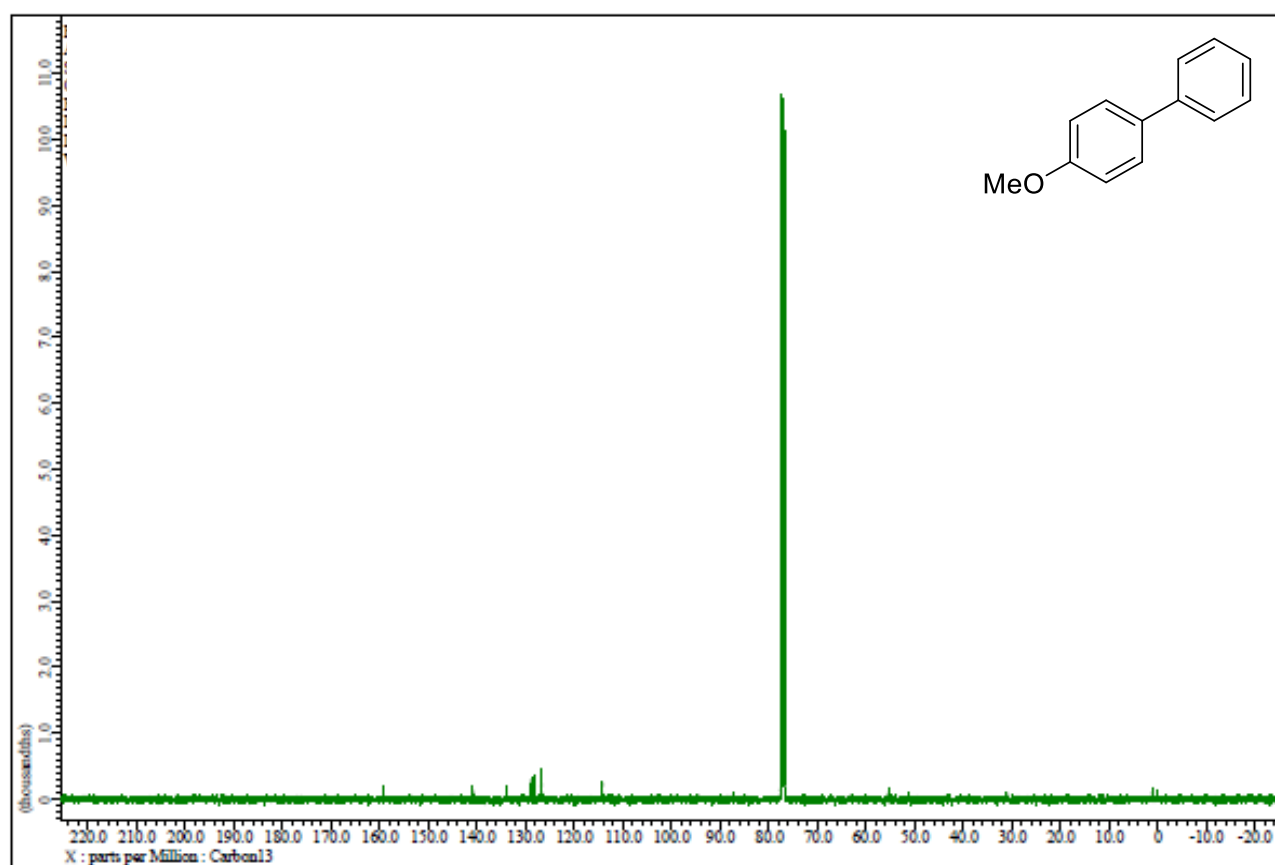

**Figure S5.** <sup>1</sup>H and <sup>13</sup>C NMR spectra of 4-methoxybiphenyl.

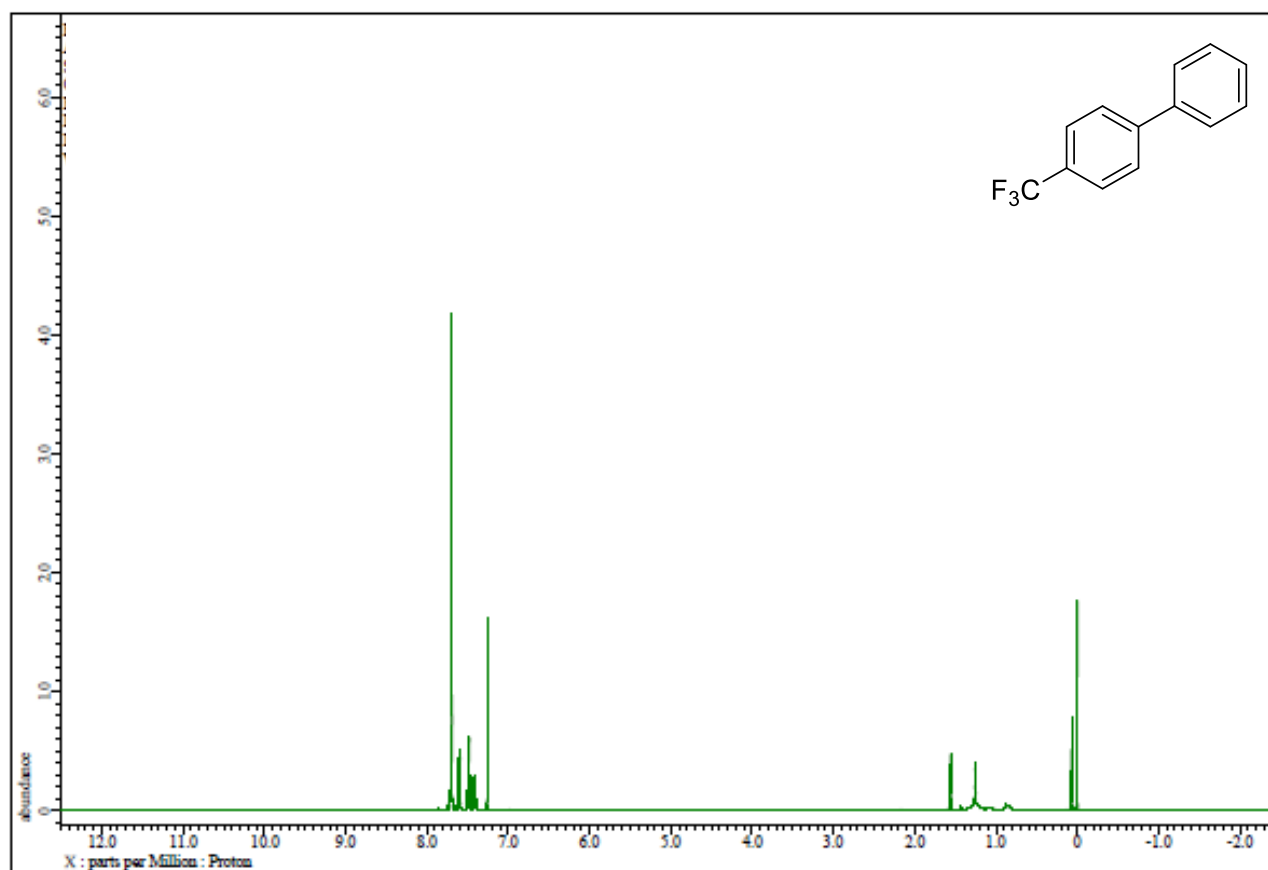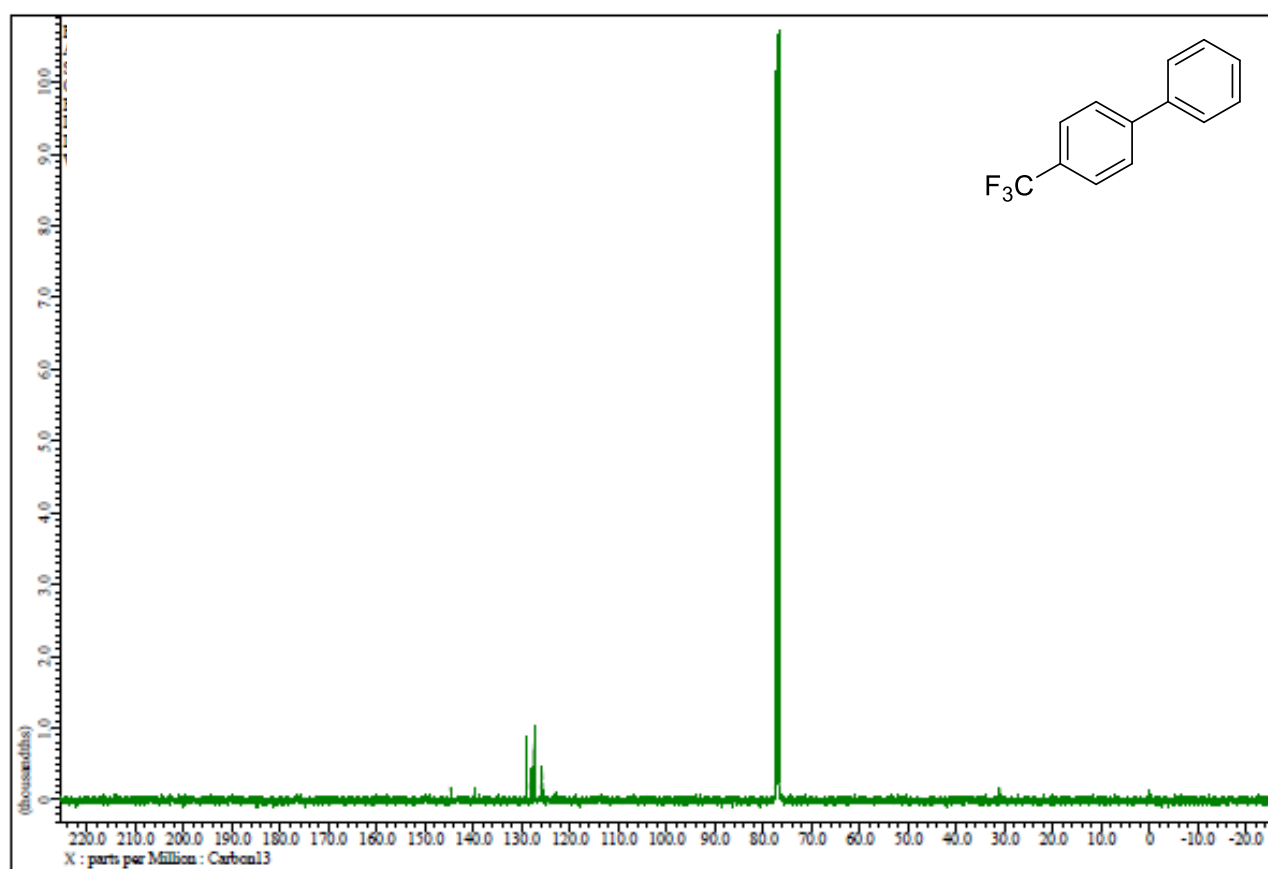

**Figure S6.** <sup>1</sup>H and <sup>13</sup>C NMR spectra of 4-trifluoromethylbiphenyl.

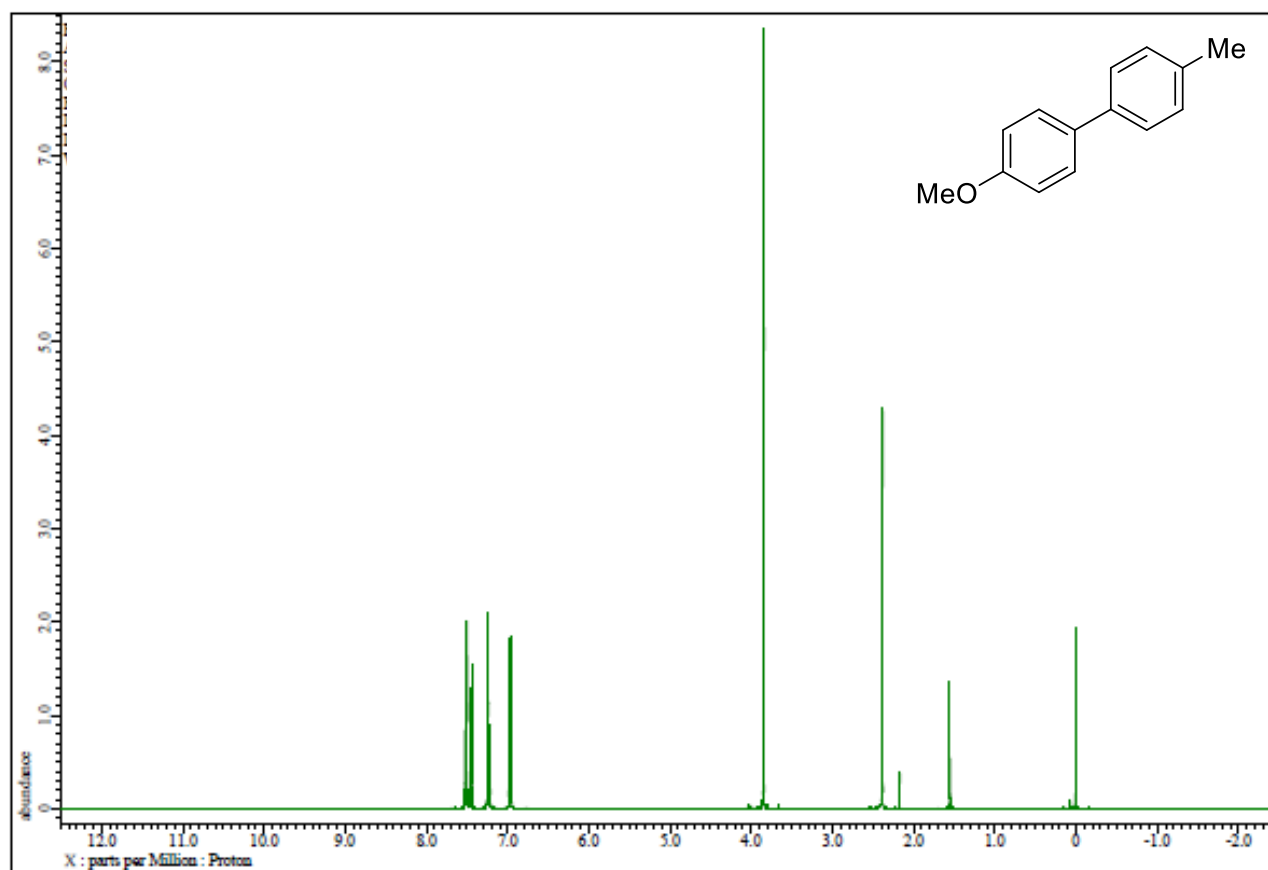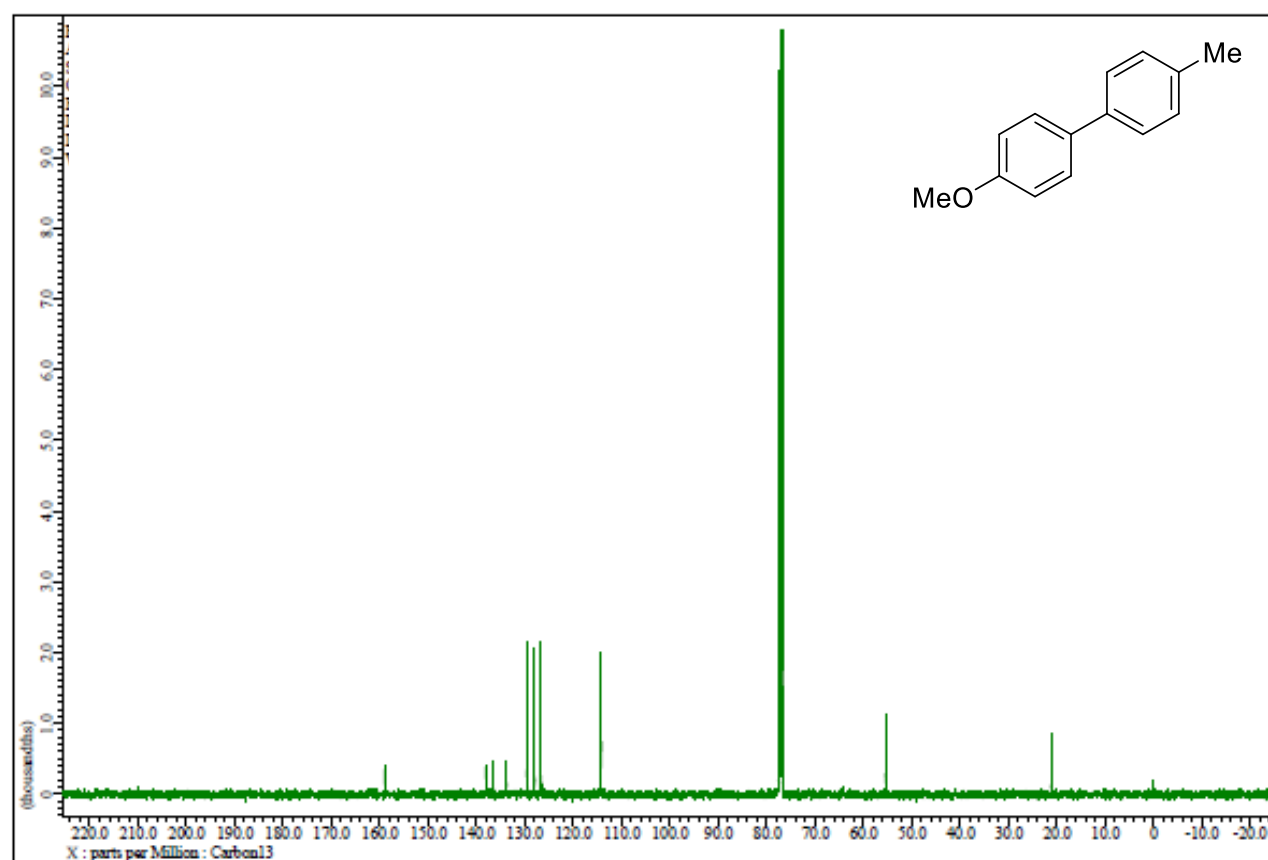

**Figure S7.** <sup>1</sup>H and <sup>13</sup>C NMR spectra of 4-methoxy-4'-methylbiphenyl.



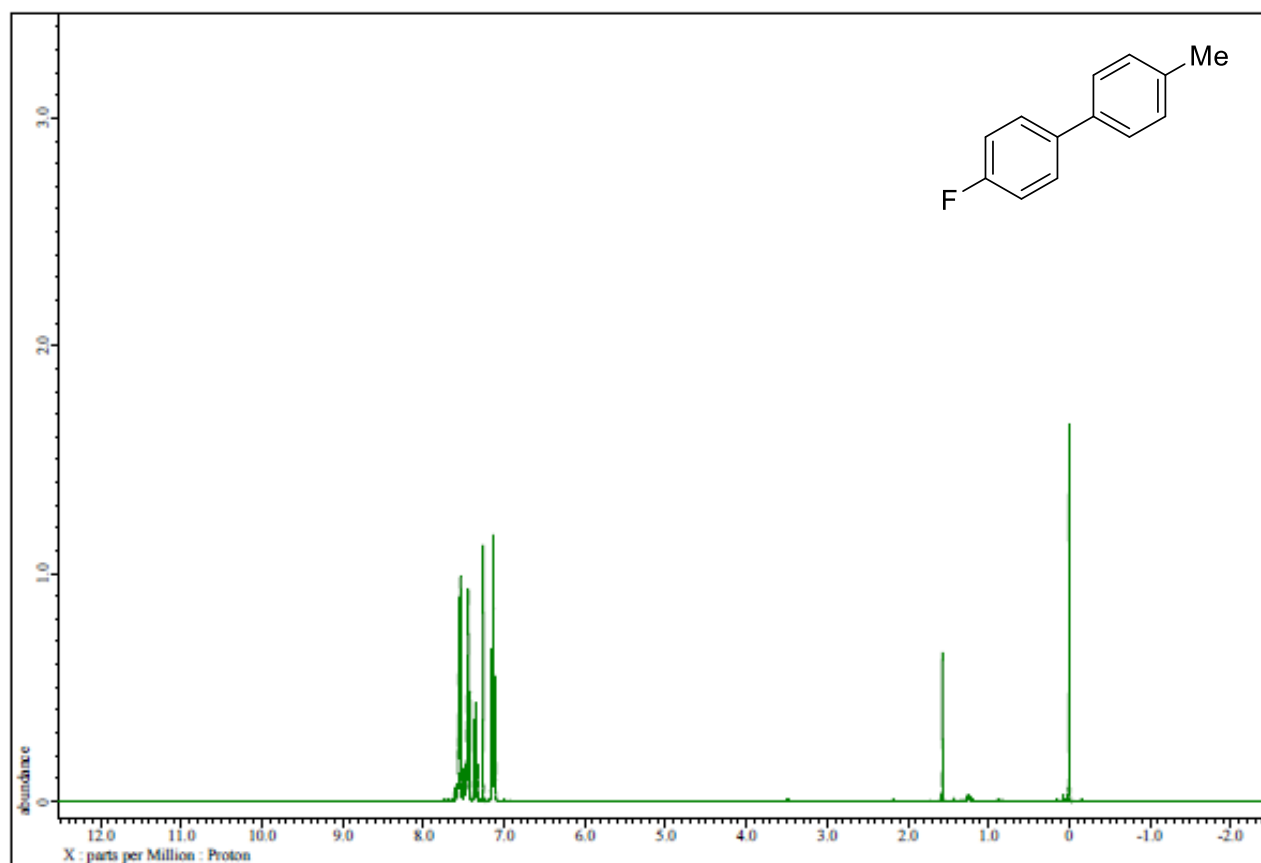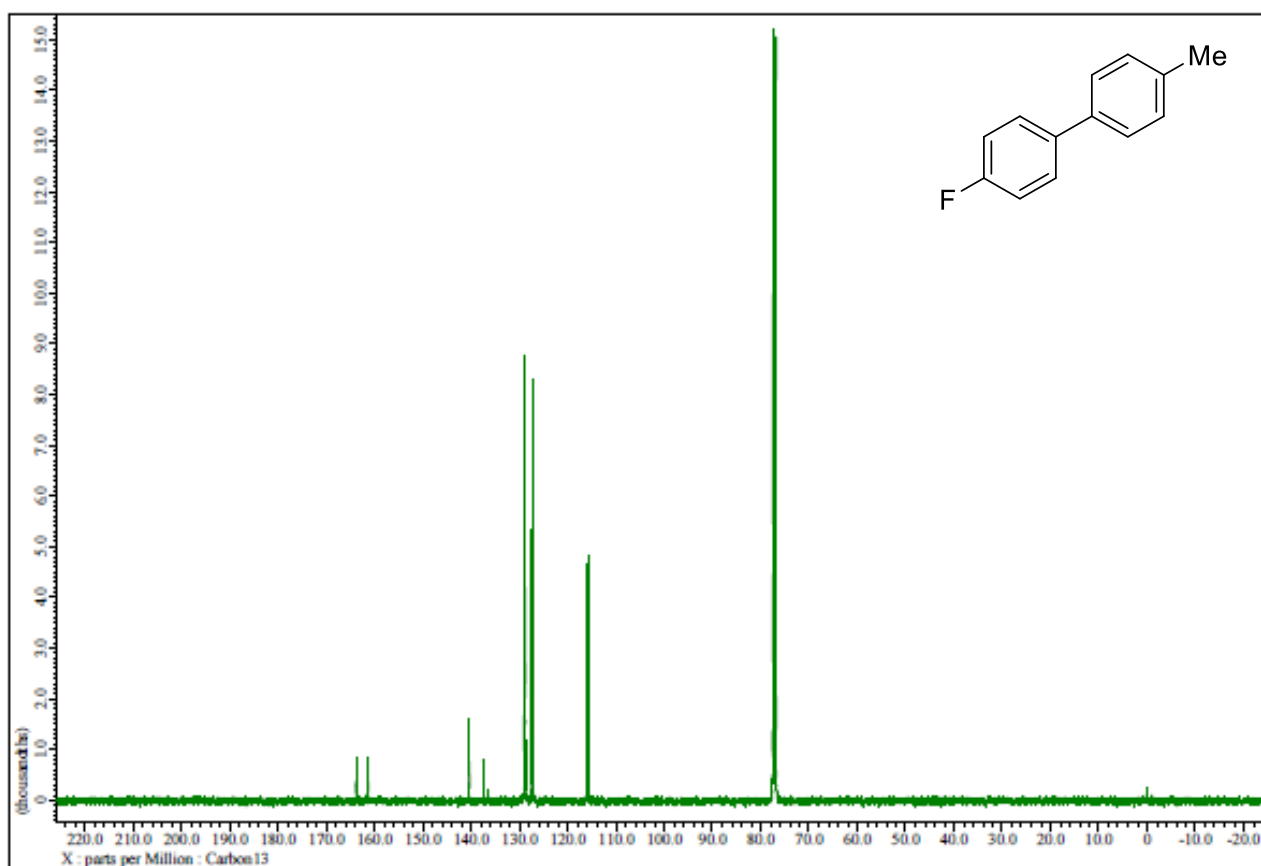

**Figure S8.** <sup>1</sup>H and <sup>13</sup>C NMR spectra of 4-fluoro-4'-methylbiphenyl.

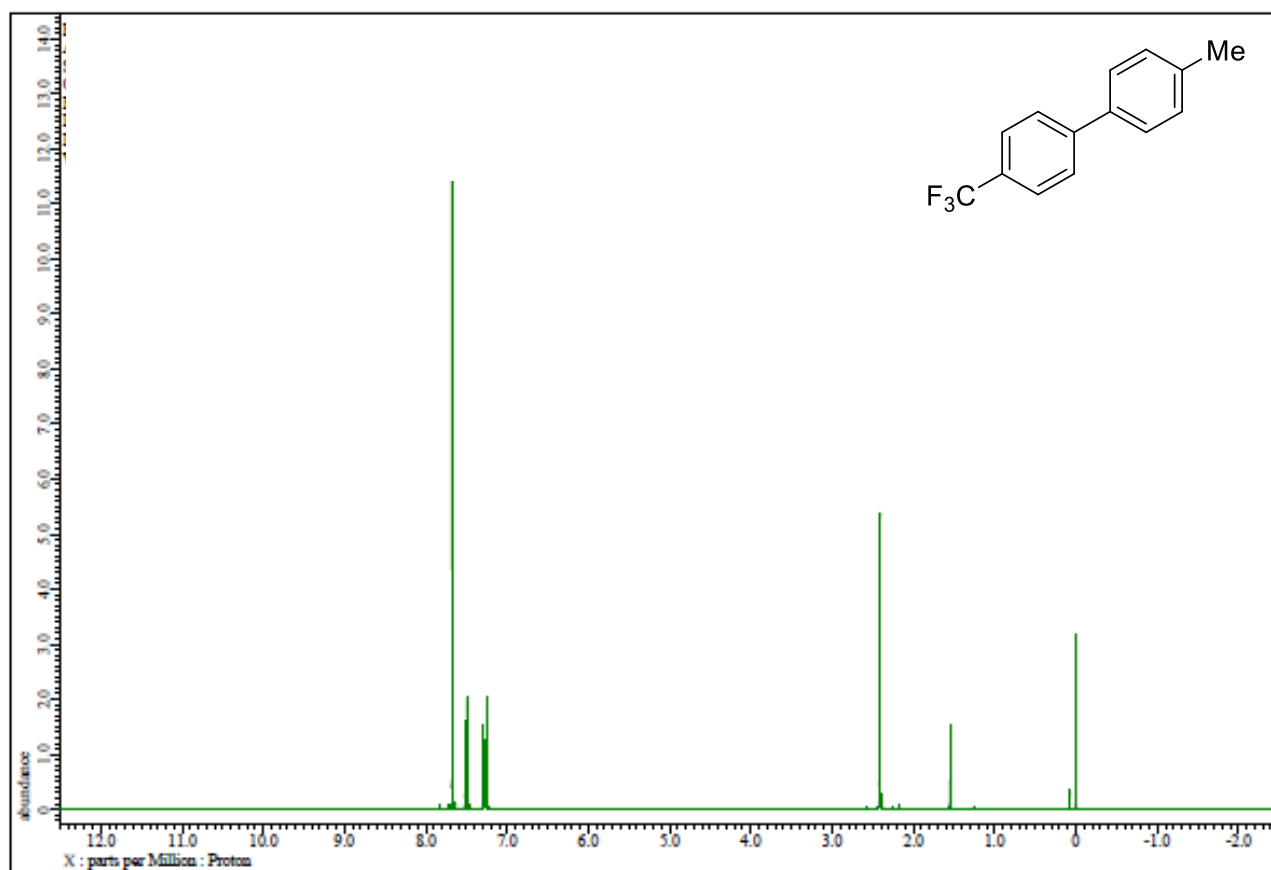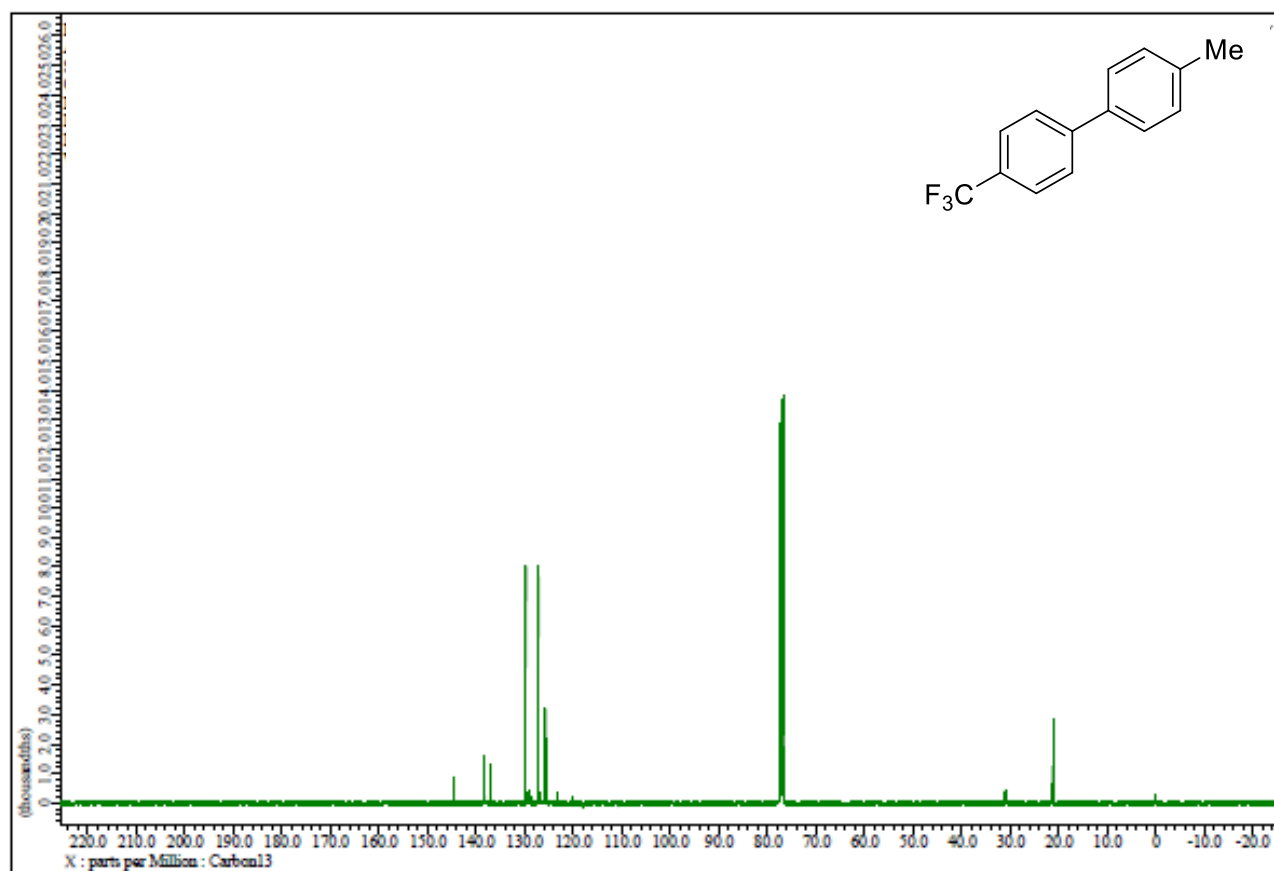

**Figure S9.** <sup>1</sup>H and <sup>13</sup>C NMR spectra of 4-Methyl-4'-(trifluoromethyl)biphenyl.

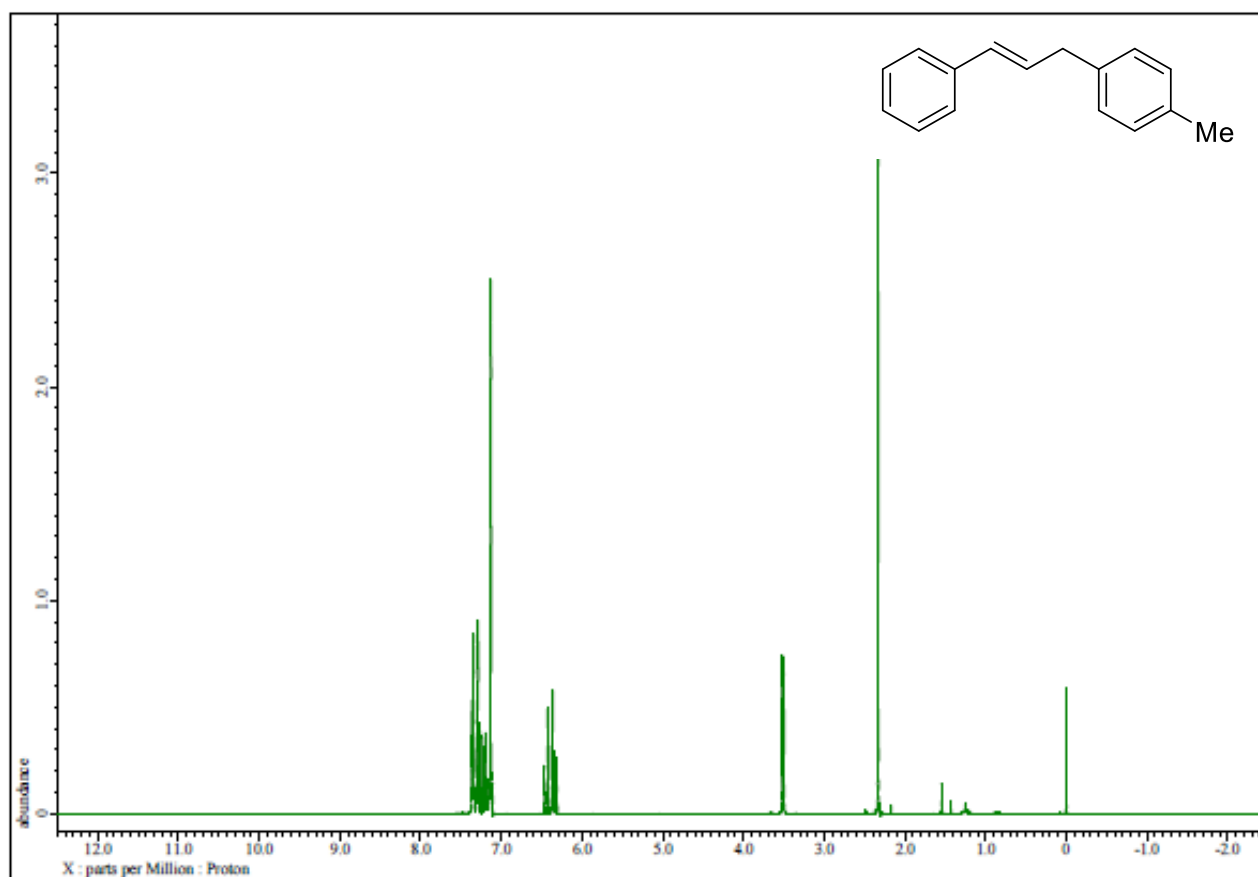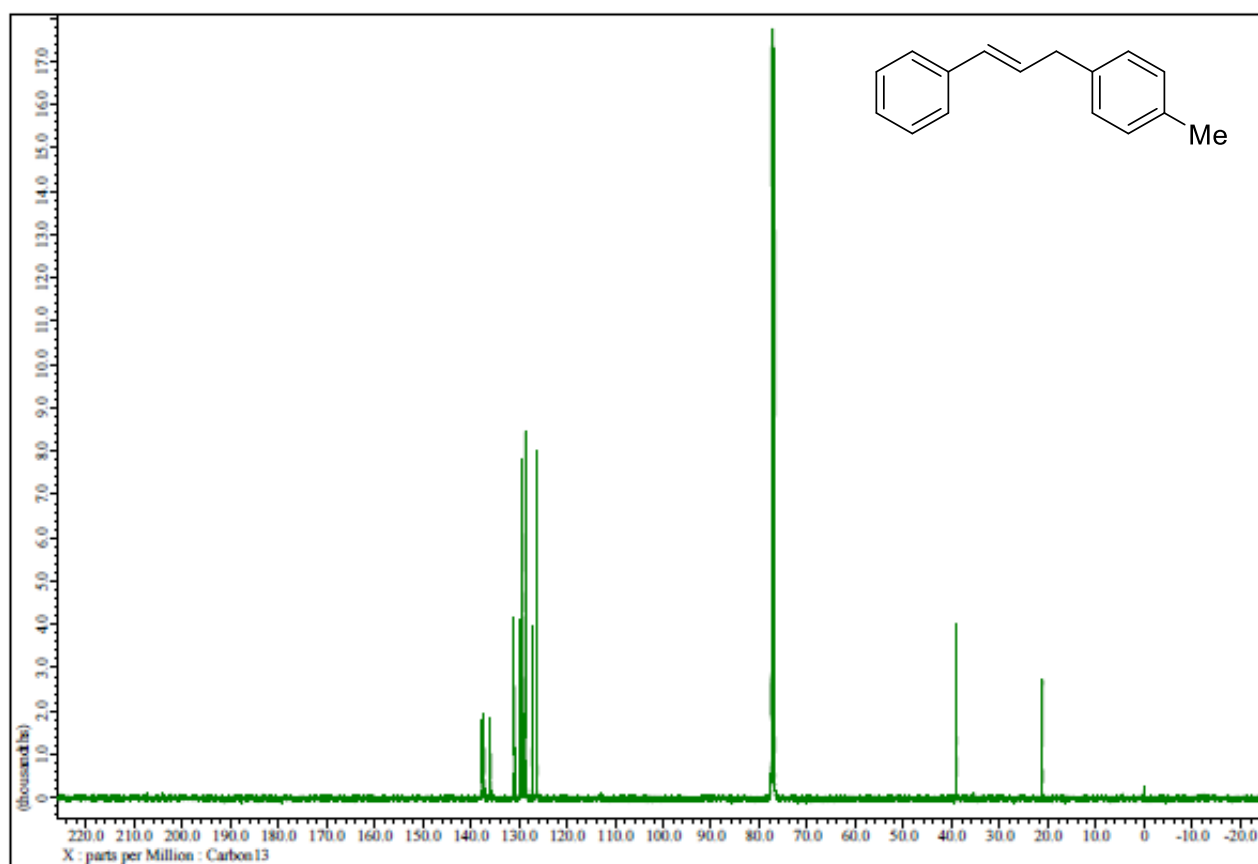

**Figure S10.** <sup>1</sup>H and <sup>13</sup>C NMR spectra of (E)-3-(4-methylphenyl)-1-phenylpropene.

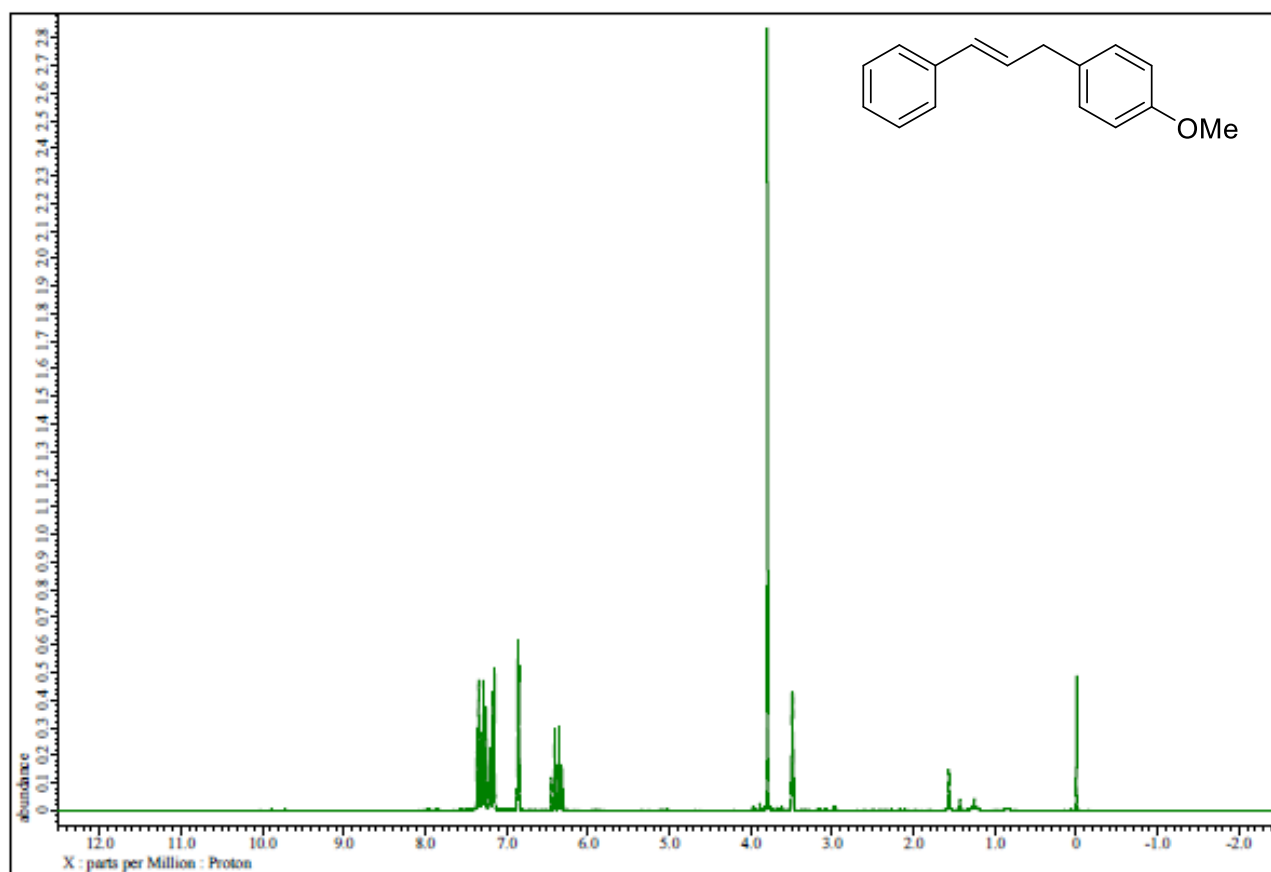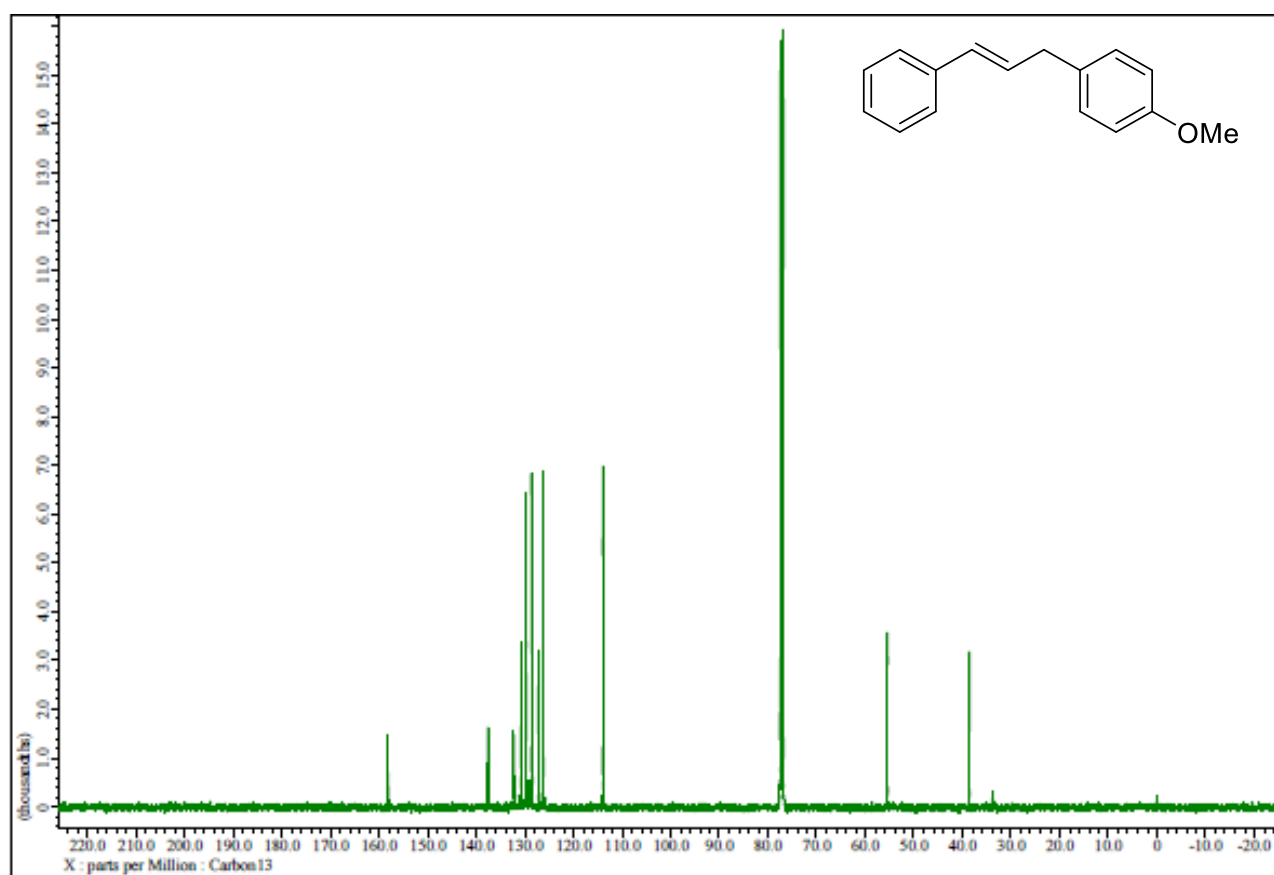

**Figure S11.** <sup>1</sup>H and <sup>13</sup>C NMR spectra of (E)-3-(4-methoxyphenyl)-1-phenylpropene.

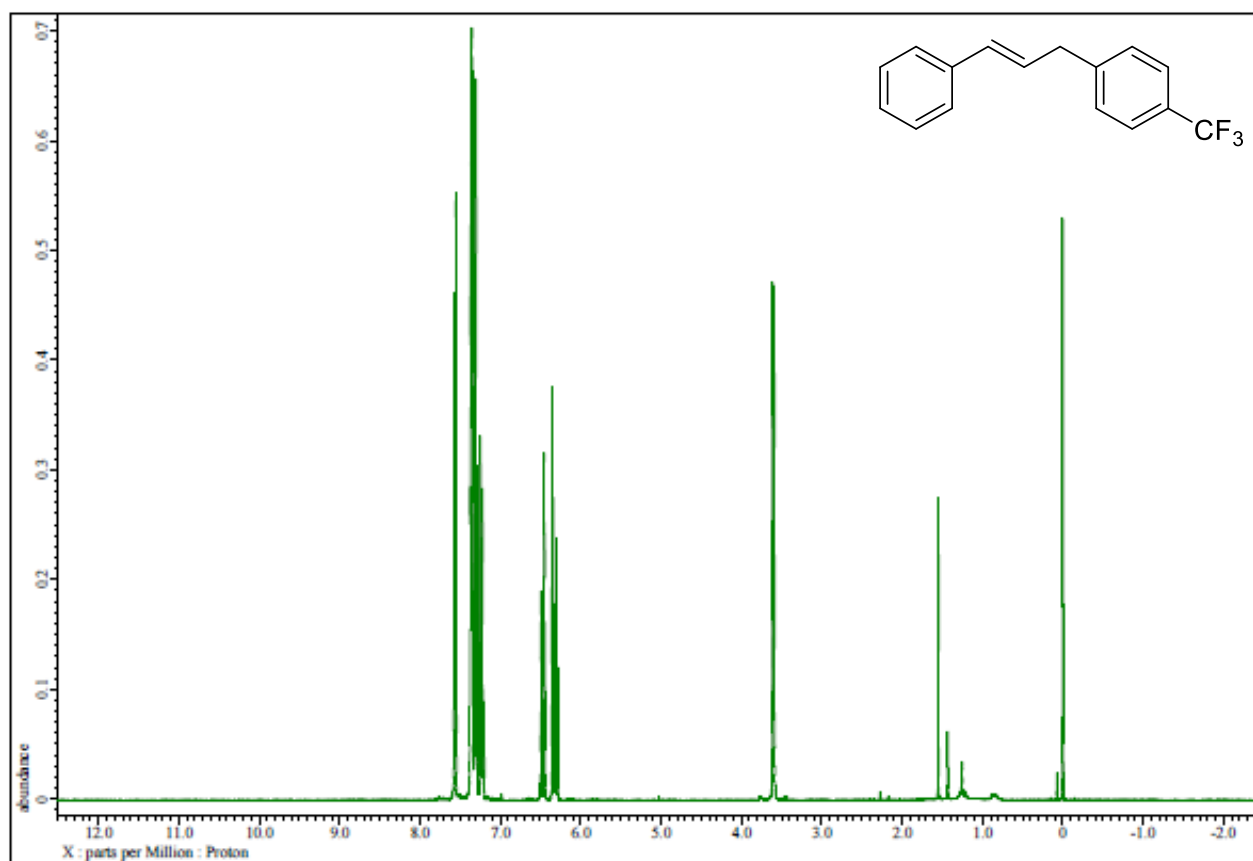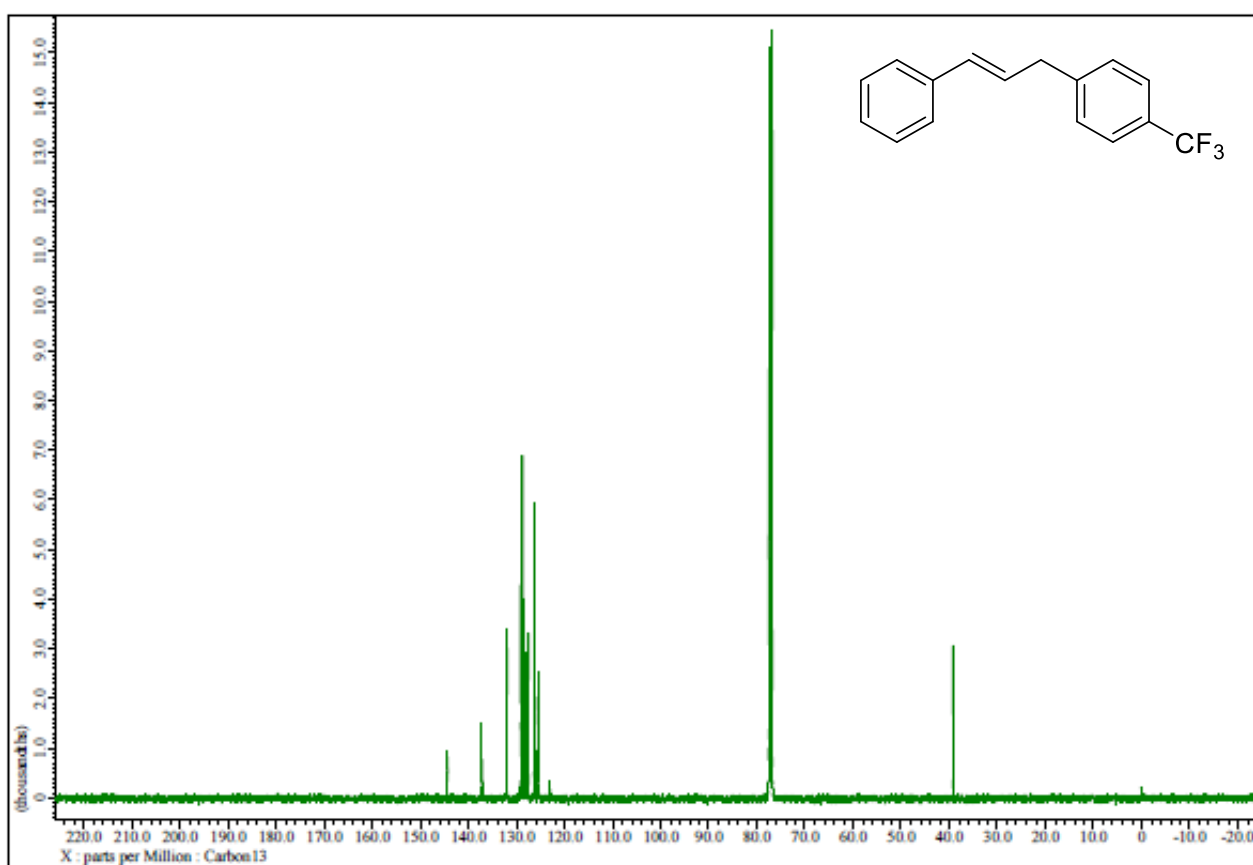

**Figure S12.** <sup>1</sup>H and <sup>13</sup>C NMR spectra of (E)-3-(4-trifluoromethylphenyl)-1-phenylpropene.

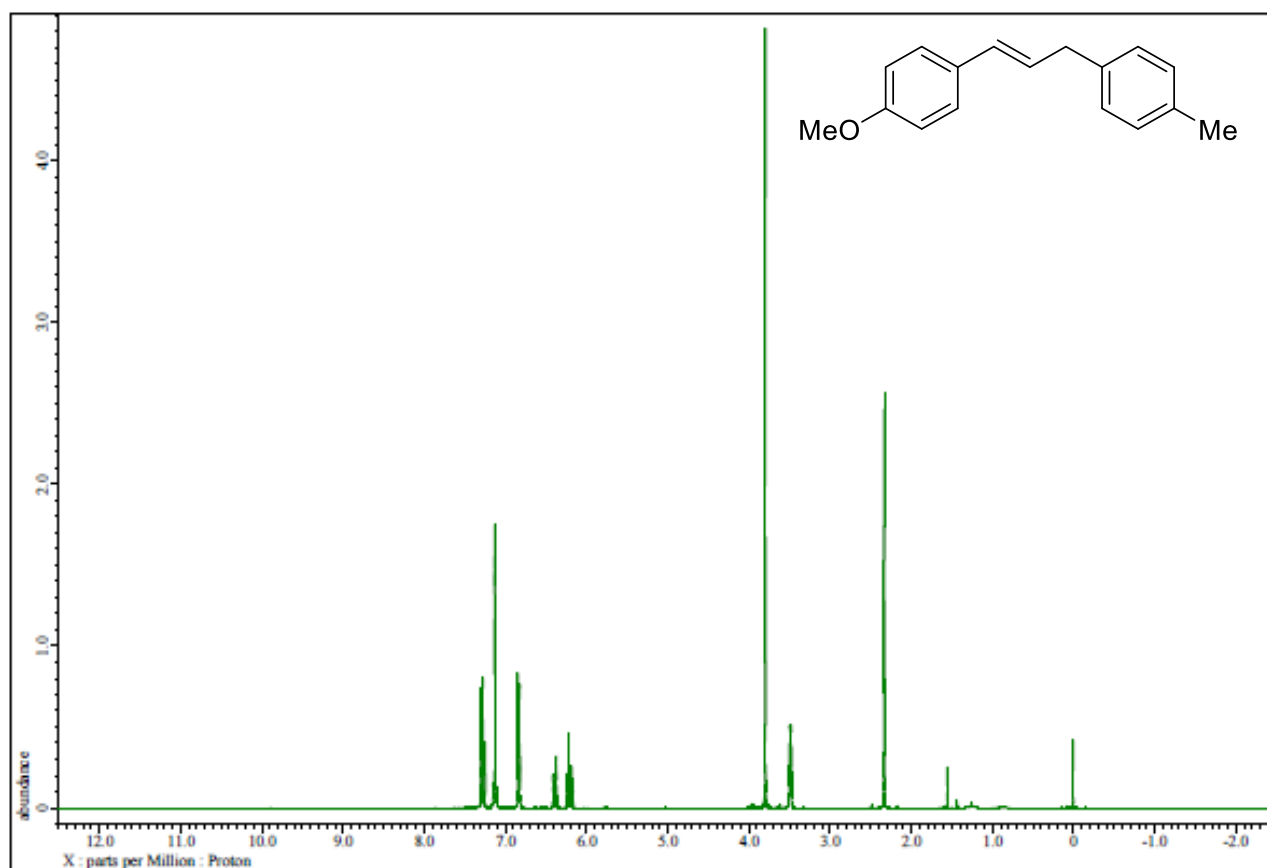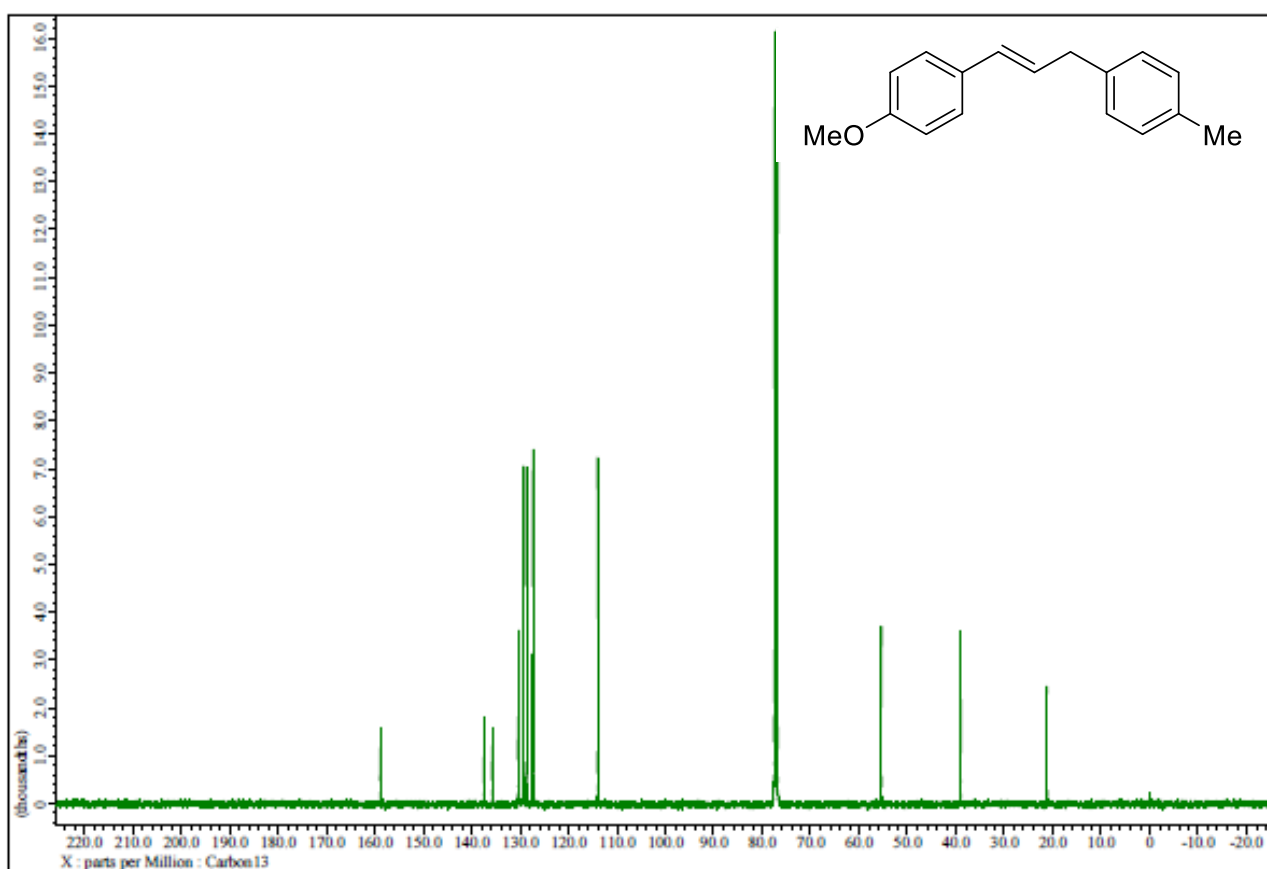

**Figure S13.** <sup>1</sup>H and <sup>13</sup>C NMR spectra of (*E*)-1-(4-methoxyphenyl)-3-(4-methylphenyl)propene.

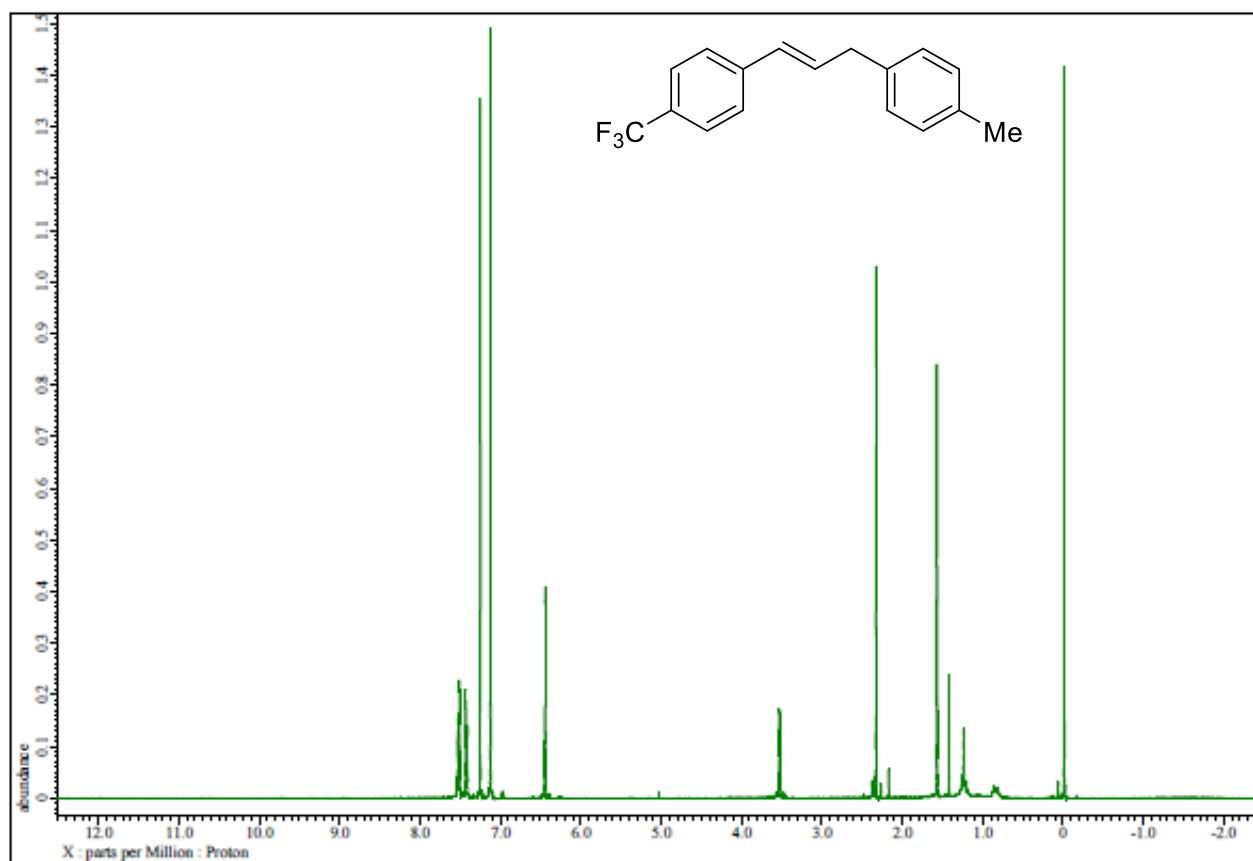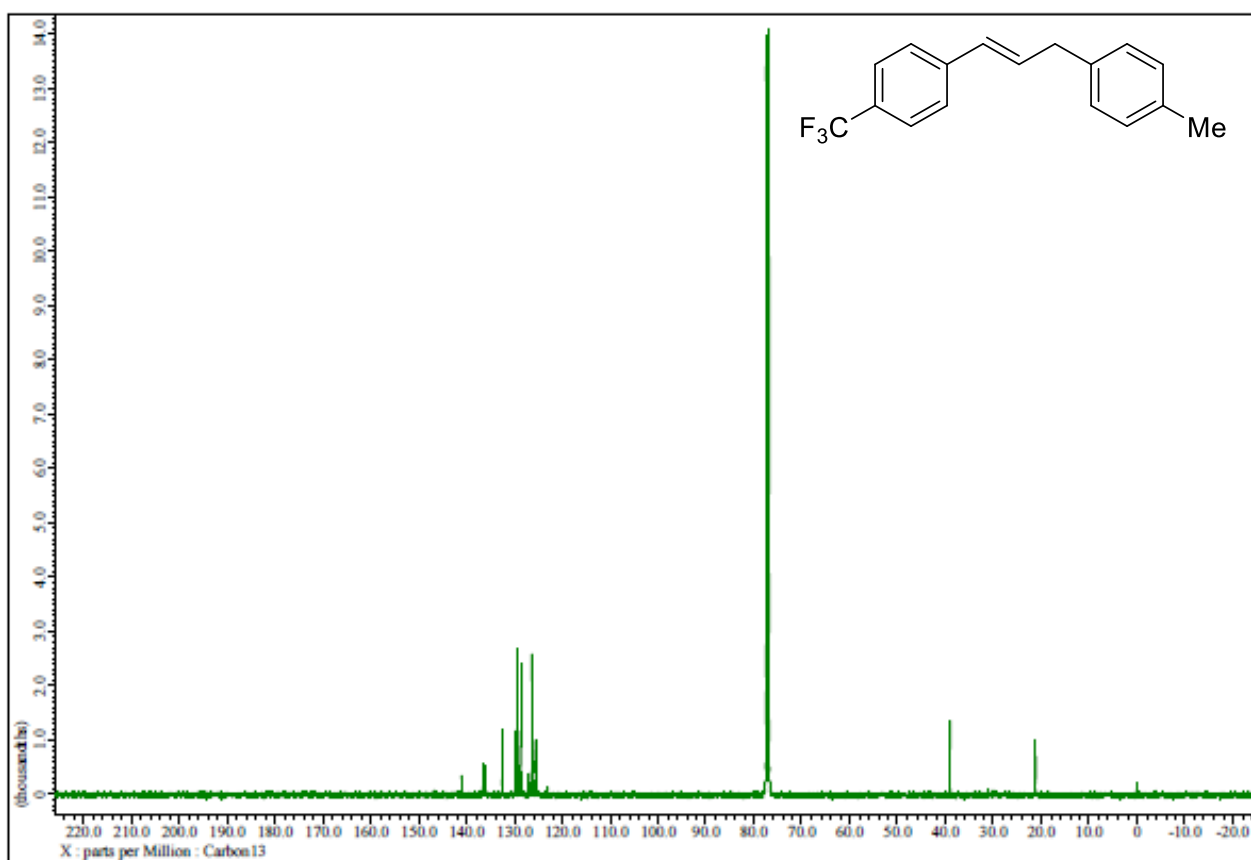

**Figure S14.** <sup>1</sup>H and <sup>13</sup>C NMR spectra of (E)-1-(4-methoxyphenyl)-3-(4-methylphenyl)propene.
